# Supplementary material for: Loss of H2A.Z Is Not Sufficient to Determine Transcriptional Activity of Snf2-Related CBP Activator Protein or p400 Complexes
Source: Hindawi journal article supplement (doi:10.1155/2011/715642), 2011-01-01

**Supplemental Figure S1: SRCAP knockdown reduces H2A.Z binding at the *p21* promoter.**

A schematic of the *p21* promoter and the location of primers used in the study are shown. The black bar represents the site of highest H2A.Z deposition in U2OS cells. Standard CHIP assay was used to determine the relative level of H2A.Z binding in A549 cells harvested 72 hours post-transfection with control or SRCAP siRNA. The DNA was amplified by qPCR using overlapping primers tiling the *p21* promoter, listed in Supplemental Table 1B.

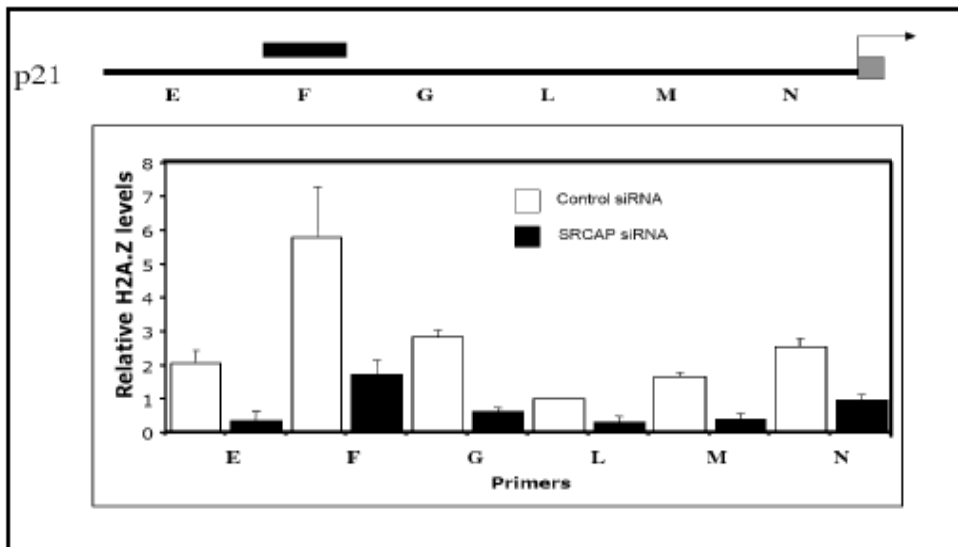

Supplement: f1 [file 715642.f1.pdf]
