# Supplementary material for: Loss of H2A.Z Is Not Sufficient to Determine Transcriptional Activity of Snf2-Related CBP Activator Protein or p400 Complexes
Source: Hindawi journal article supplement (doi:10.1155/2011/715642), 2011-01-01
Supplement: f3 [file 715642.f3.pdf]

**Supplemental Table 1: *p21* primers employed in the study. A. RT-qPCR primers used for mRNA detection. B Standard ChIP primers. C. Nucleosome ChIP primers**

A.

*p21* mRNA Primer (5' – 3') Forward: GGAGACTCTCAGGGTCGAAA  
Reverse: GGATTAGGGCTTCCTCTTGG

B.

| <u>Primer Name</u> | <u>Primer Position</u> | <u>Sequence (5' – 3')</u>                    |
|--------------------|------------------------|----------------------------------------------|
| p21-E              | -2525                  | ACATTGTTCCCAGCACTTCC<br>TAGGGGAATGGTGAAAGGTG |
| p21-F              | -2292                  | CTGTGGCTCTGATTGGCTTT<br>CTCCTACCATCCCCTTCCTC |
| p21-G              | -2073                  | GGATCTGATGCATGTGTGCT<br>CAAGGGAGCAGGCTGTAAA  |
| p21-L              | -1034                  | TTGTCATTTTGGAGCCACAG<br>GGGCTCAGAGAAGTCTGGTG |
| p21-M              | -695                   | CTCTCCAATTCCCTCCTTCC<br>TAGGTGCTGGAGGTGCTTCT |
| p21-N              | -345                   | GGGGCTCATTCTAACAGTGC<br>GACACATTTCCCCACGAAGT |

C.

| <u>Primer Position</u> | <u>Sequence (5'- 3')</u>                        | <u>Product size (bp)</u> |
|------------------------|-------------------------------------------------|--------------------------|
| -2925 / -2793          | TGCTAGGAACATGAGCAAACCTG<br>CCCGAGTAGCTGGGATTACA | 133                      |
| -2668 / -2560          | GGCTGCCTCTGCTCAATAAT<br>ATAGGGGCAGTCAGCTTTCA    | 109                      |
| -2625 / -2505          | TCTGGGGTCTCACTTCTTGG<br>AGGAAGTGCTGGGAACAATG    | 121                      |
| -2557 / -2457          | GGGACTCCCCAGTCTCTTTC<br>ATGTGAGGAAGGCTCAGTGG    | 101                      |
| -2525 / -2412          | ACATTGTTCCCAGCACTTCC<br>TAGGGAATGGTGAAAGGTG     | 114                      |
| -2470 / -2364          | AGCCTTCCTCACATCCTCCT<br>GACAAGAGTGCCCAGTCCAG    | 107                      |
| -2436 / -2322          | CCTTTCACCATTCCCCTACC<br>AGGCAGCATAGGGATGGAG     | 115                      |
| -2377 / -2248          | CTGGACTGGGCACTCTTGTC<br>GTTGGGACATGTTCTGACG     | 130                      |
| -2292 / -2196          | CTGTGGCTCTGATTGGCTTT<br>GCAGCCCAAGGACAAAATAG    | 97                       |
| -2249 / 2164           | CATGTTGAGCTCTGGCATAGA<br>TCTCCTACCATCCCCTTCCT   | 86                       |
| -2198 / -2092          | GCCTGTTTTTCAGGTGAGGAA<br>CTGCTGGCAGATCACATACC   | 107                      |
| -2178 / -2048          | AGGGGATGGTAGGAGACAGG<br>ACACAAGCACACATGCATCA    | 131                      |
| -2068 / -1925          | CTGATGCATGTGTGCTTGTG<br>AGTTTGCAACCATGCACTTG    | 145                      |
| -1984 / -1848          | GGGCAGAAGTCCTCCCTTAG<br>CTCACCACCACGACAT        | 137                      |
