# Supplementary material for: Loss of H2A.Z Is Not Sufficient to Determine Transcriptional Activity of Snf2-Related CBP Activator Protein or p400 Complexes
Source: Hindawi journal article supplement (doi:10.1155/2011/715642), 2011-01-01
Supplement: f4 [file 715642.f4.pdf]

**SupplementalTable2: *Sp1* primers employed in the study.** Nucleosome ChIP

| Primer Position | Sequence (5' - 3')                                | Product size (bp) |
|-----------------|---------------------------------------------------|-------------------|
| -1462 / -1334   | CAGCAGAGGCCTCAGTTCTT<br>GATGAGGTCATGTCCTTCAGTATTT | 129               |
| -1350 / -1222   | AAGGACATGACCTCATCGTGT<br>CAGCTTTTTGCAATCACGAA     | 129               |
| -1241 / -1135   | TTCGTGATTGCAAAAAGCTG<br>TTGAGGCTAAAGTGCGGATAA     | 107               |
| -1109 / -983    | AAGGGTTAGCGCCTTTGTC<br>GGGACGAGATCTGGTGACAG       | 127               |
| -1010 / -885    | GGTGAGTGCTGTCACCAGAT<br>TGCCCCTATAAAGTACCTCTCAA   | 126               |
| -859 / -751     | TAGTGTTGATGCGGAACTGC<br>TCCTCAGGGGACGTTGTTAC      | 109               |
| -788 / -657     | GCGTCCCACCTTAATGACTGT<br>CGCCTCCTAGTTAGCCAATG     | 132               |
| -700 / -582     | ATGATGGGCAGCTCCAGTAA<br>ACTTGGAGTGGCAGAGGAGA      | 119               |
| -601 / -476     | TCTCCTCTGCCACTCCAAGT<br>GCAGCCAGGAACGTTATGAT      | 126               |
| -474 / -378     | CGCCTGATTTCTGATTGGTT<br>GAATCCGGGATATGCTTGG       | 97                |
| -403 / -273     | ACTAGGATTTTGCCCAAGCA<br>TGATTGGCTTGGAAGGAAAC      | 131               |
| -301 / -190     | GGTTGACTGGTTTCCTTCCA<br>TGGTGTCCGCCTAAAAAGAC      | 112               |
| -218 / -113     | GAGAGGGCGGTCTTTTTAGG<br>GCAGAAGAAAGACGGTGGAA      | 106               |
| -193 / -85      | ACCAGGCACGCAACTTAGTC<br>CAATGAGGGAGGGGGAAA        | 109               |
| -60 / +80       | GGCCTAGGTTGGGCTTGT<br>AAGCTCAAGGGGGTCCTGT         | 139               |

+7 / +118

GTTCGCTTGCCTCGTCAG  
GGACTCATCCTTACCGCTC

112
