# Supplementary material for: Loss of H2A.Z Is Not Sufficient to Determine Transcriptional Activity of Snf2-Related CBP Activator Protein or p400 Complexes
Source: Hindawi journal article supplement (doi:10.1155/2011/715642), 2011-01-01
Supplement: f5 [file 715642.f5.pdf]

**Table 3: siRNA duplex sequences**

| Name    | Sequence (5' – 3')                                       |
|---------|----------------------------------------------------------|
| Control | CAUCGAGACGCUAGCAGAUCCUGCG<br>GCGUAGCUCUGCGAUCGUCUAGGACGC |
| SRCAP   | CAACAAACAGCCUUGGCAUCCAGAT<br>GCGUUGUUUGUCGGAACCGUAGGUCUA |
| p400    | CCAACGUUUCAAUUCAAGCUCCCACUU<br>GUGGGAGCUUGAAUUGAAACGUUGG |

| Name | Sequence (5' – 3') |
|------|--------------------|
|      |                    |
|      |                    |
|      |                    |
